# Supplementary material
Source: PubMed Central journal article supplement (PMC4986554)
Supplement: supp_ivv327_ivv327supp2.pdf [file supp_ivv327_ivv327supp2.pdf]

## Summary of the electronic literatures search

### PubMed search strategy

| Searches | Search details                                                                                                                                                                                                                                                                                                                                                                                                                                                                                                                                                                                                                                                                                                                                                                                                                                                                                                                                                                                                                                                                                | Items found |
|----------|-----------------------------------------------------------------------------------------------------------------------------------------------------------------------------------------------------------------------------------------------------------------------------------------------------------------------------------------------------------------------------------------------------------------------------------------------------------------------------------------------------------------------------------------------------------------------------------------------------------------------------------------------------------------------------------------------------------------------------------------------------------------------------------------------------------------------------------------------------------------------------------------------------------------------------------------------------------------------------------------------------------------------------------------------------------------------------------------------|-------------|
| #1       | <b>Search</b> ((bronchopleural[All Fields] AND ("fistula"[MeSH Terms] OR "fistula"[All Fields])) OR ("bronchial fistula"[MeSH Terms] OR ("bronchial"[All Fields] AND "fistula"[All Fields]) OR "bronchial fistula"[All Fields])) AND ("risk factors"[MeSH Terms] OR ("risk"[All Fields] AND "factors"[All Fields]) OR "risk factors"[All Fields] OR ("risk"[All Fields] AND "factor"[All Fields]) OR "risk factor"[All Fields]) AND ("1990/01/01"[PDAT] : "2015/07/23"[PDAT])                                                                                                                                                                                                                                                                                                                                                                                                                                                                                                                                                                                                                 | <b>208</b>  |
| #2       | <b>Search</b> ((bronchopleural[All Fields] AND ("fistula"[MeSH Terms] OR "fistula"[All Fields])) OR ("bronchial fistula"[MeSH Terms] OR ("bronchial"[All Fields] AND "fistula"[All Fields]) OR "bronchial fistula"[All Fields])) AND ("epidemiology"[Subheading] OR "epidemiology"[All Fields] OR "incidence"[All Fields] OR "incidence"[MeSH Terms]) AND ("1990/01/01"[PDAT] : "2015/07/23"[PDAT])                                                                                                                                                                                                                                                                                                                                                                                                                                                                                                                                                                                                                                                                                           | <b>467</b>  |
| #3       | <b>Search</b> ((bronchopleural[All Fields] AND ("fistula"[MeSH Terms] OR "fistula"[All Fields])) OR ("bronchial fistula"[MeSH Terms] OR ("bronchial"[All Fields] AND "fistula"[All Fields]) OR "bronchial fistula"[All Fields])) AND "causality"[MeSH Terms] AND ("1990/01/01"[PDAT] : "2015/07/23"[PDAT])                                                                                                                                                                                                                                                                                                                                                                                                                                                                                                                                                                                                                                                                                                                                                                                    | <b>128</b>  |
| #4       | <b>Search</b> ((((((("neoplasm, residual"[MeSH Terms] OR ("neoplasm"[All Fields] AND "residual"[All Fields]) OR "residual neoplasm"[All Fields] OR ("residual"[All Fields] AND "cancer"[All Fields]) OR "residual cancer"[All Fields]) OR (residual[All Fields] AND ("carcinoma"[MeSH Terms] OR "carcinoma"[All Fields]))) OR ("neoplasm, residual"[MeSH Terms] OR ("neoplasm"[All Fields] AND "residual"[All Fields]) OR "residual neoplasm"[All Fields] OR ("residual"[All Fields] AND "disease"[All Fields]) OR "residual disease"[All Fields]) OR ("residual tumour"[All Fields] OR "neoplasm, residual"[MeSH Terms] OR ("neoplasm"[All Fields] AND "residual"[All Fields]) OR "residual neoplasm"[All Fields] OR ("residual"[All Fields] AND "tumor"[All Fields]) OR "residual tumor"[All Fields])) OR (incomplete[All Fields] AND resection[All Fields])) OR (R1[All Fields] AND resection[All Fields])) AND (bronchopleural[All Fields] AND ("fistula"[MeSH Terms] OR "fistula"[All Fields])) AND ("1990/01/01"[PDAT] : "2015/07/23"[PDAT])                                            | <b>55</b>   |
| #5       | <b>Search</b> ((((((("neoplasm, residual"[MeSH Terms] OR ("neoplasm"[All Fields] AND "residual"[All Fields]) OR "residual neoplasm"[All Fields] OR ("residual"[All Fields] AND "cancer"[All Fields]) OR "residual cancer"[All Fields]) OR (residual[All Fields] AND ("carcinoma"[MeSH Terms] OR "carcinoma"[All Fields]))) OR ("neoplasm, residual"[MeSH Terms] OR ("neoplasm"[All Fields] AND "residual"[All Fields]) OR "residual neoplasm"[All Fields] OR ("residual"[All Fields] AND "disease"[All Fields]) OR "residual disease"[All Fields]) OR ("residual tumour"[All Fields] OR "neoplasm, residual"[MeSH Terms] OR ("neoplasm"[All Fields] AND "residual"[All Fields]) OR "residual neoplasm"[All Fields] OR ("residual"[All Fields] AND "tumor"[All Fields]) OR "residual tumor"[All Fields])) OR (incomplete[All Fields] AND resection[All Fields])) OR (R1[All Fields] AND resection[All Fields])) AND ("bronchial fistula"[MeSH Terms] OR ("bronchial"[All Fields] AND "fistula"[All Fields]) OR "bronchial fistula"[All Fields])) AND ("1990/01/01"[PDAT] : "2015/07/23"[PDAT]) | <b>63</b>   |

### EMBASE (via Ovid interface) search strategy

| Search strings | #   | Searches                                                                                                                                                      | Items found |
|----------------|-----|---------------------------------------------------------------------------------------------------------------------------------------------------------------|-------------|
| 1              | #1  | Search ((bronchopleural fistula or bronchial fistula) and risk factor).af.                                                                                    | 218         |
|                | #2  | limit 1 to yr="1990 -2015"                                                                                                                                    | 215         |
| 2              | #3  | Search ((bronchopleural fistula or bronchial fistula) and incidence).af.                                                                                      | 316         |
|                | #4  | limit 3 to yr="1990 - 2015"                                                                                                                                   | 283         |
| 3              | #5  | Search ((bronchopleural fistula or bronchial fistula) and etiology).af.                                                                                       | 117         |
|                | #6  | limit 5 to yr="1990 - 2015"                                                                                                                                   | 66          |
| 4              | #7  | Search ((residual cancer or residual carcinoma or residual tumor or residual disease or incomplete resection or R1 resection) and bronchopleural fistula).af. | 30          |
|                | #8  | limit 7 to yr="1990 - 2015"                                                                                                                                   | 27          |
| 5              | #9  | Search ((residual cancer or residual carcinoma or residual tumor or residual disease or incomplete resection or R1 resection) and bronchial fistula).af.      | 2           |
|                | #10 | limit 9 to yr="1990 - 2015"                                                                                                                                   | 2           |

**Table S1: Summary of the 2 excluded studies after lastly filtration**

| No. | Authors (year)             | Nation | Study design | No. samples | Reasons for exclusion                               |
|-----|----------------------------|--------|--------------|-------------|-----------------------------------------------------|
| 1   | Kawaguchi et al (2008)[23] | Japan  | ROS          | 74          | All cohorts of patients have the presence of RDBS   |
| 2   | Ross et al (2012)[24]      | USA    | ROS          | 41          | No extractable demographic details of BPF formation |

ROS: retrospective observational study; RDBS: residual disease at the bronchial stump; BPF:

bronchopleural fistula.
